# Psychiatric Services

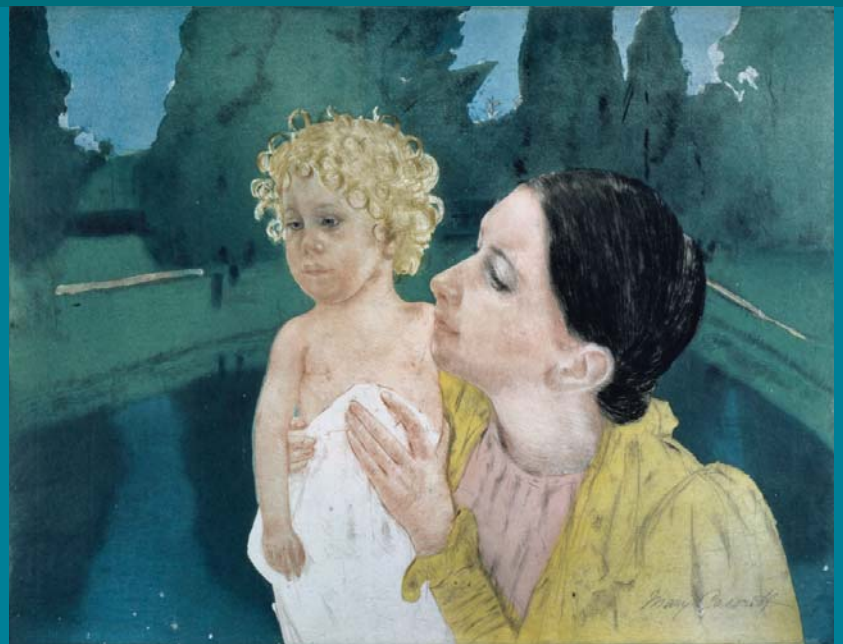

One-year outcomes of Housing First with ACT in five Canadian cities

Antidepressant self-discontinuation: an overlooked aspect of treatment

Primary care–based medical homes for individuals with severe mental illness

Impact of psychiatric hospitalizations on family caregivers: a systematic review
