# Psychiatric Services

A Journal of the American Psychiatric Association

*Psychiatric Services*, established in 1950, is published monthly by the American Psychiatric Association for mental health professionals and others concerned with treatment and services for persons with mental illnesses and mental disabilities, in keeping with APA's objectives to improve care and treatment, to promote research and professional education in psychiatric and related fields, and to advance the standards of all psychiatric services and facilities.

## Editor

Howard H. Goldman, M.D., Ph.D.

## Editorial Board

David A. Adler, M.D.  
Regina Bussing, M.D., M.S.H.S.  
Javier I. Escobar, M.D.  
Stephen M. Goldfinger, M.D.  
Richard K. Harding, M.D.  
Marcela Horvitz-Lennon, M.D., M.P.H.  
Roberto Lewis-Fernández, M.D.  
Ramin Mojtabai, M.D., Ph.D.  
Mark R. Munetz, M.D.  
Martha Sajatovic, M.D.  
Gregory E. Simon, M.D., M.P.H.  
T. Scott Stroup, M.D., M.P.H.

## Editor Emeritus

John A. Talbott, M.D.

## Book Review Editor

Jeffrey L. Geller, M.D., M.P.H.

## Contributing Editors

Paul S. Appelbaum, M.D., *Law & Psychiatry*  
José Miguel Caldas de Almeida, M.D., and Matt Muijen, M.D., Ph.D., *Global Mental Health Reforms*  
Francine Cournos, M.D., and Stephen M. Goldfinger, M.D., *Frontline Reports*  
Lisa B. Dixon, M.D., M.P.H., and Brian Hepburn, M.D., *Research and Services Partnerships*  
Benjamin G. Druss, M.D., M.P.H., *Integrated Care*  
Jeffrey L. Geller, M.D., M.P.H., *Personal Accounts*  
Marcela Horvitz-Lennon, M.D., M.P.H., *Best Practices*  
Amy M. Kilbourne, Ph.D., M.P.H., and Tami L. Mark, Ph.D., *Datapoints*  
Fred C. Osher, M.D., and Marvin S. Swartz, M.D., *State Mental Health Policy*  
Jules M. Ranz, M.D., Susan M. Deakins, M.D., and Stephanie Le Melle, M.D., *Case Studies in Public-Sector Leadership*  
Steven S. Sharfstein, M.D., Haiden A. Huskamp, Ph.D., and Alison Evans Cuellar, Ph.D., *Economic Grand Rounds*

## Statistical Consultant

Deborah R. Medoff, Ph.D.

## Editorial Consultants

Joseph M. Cerimele, M.D.  
Julie M. Donohue, Ph.D.  
Robert E. Drake, M.D., Ph.D.  
M. Susan Ridgely, J.D.  
Laura Van Tosh

## Editorial Staff

Constance Grant Gartner  
*Managing Editor*  
Demarie S. Jackson  
*Associate Editor*  
Kathleen Stearman  
*Associate Editor*  
Wendy Lieberman Taylor  
*Production Manager*  
Y. Nicole Gray  
*Editorial Support Services Manager*

## Publisher

Rebecca D. Rinehart

## American Psychiatric Association

Paul Summergrad, M.D., *President*  
Renée L. Binder, M.D., *President-Elect*  
Jenny L. Boyer, M.D., Ph.D., J.D., *Speaker, APA Assembly*  
Saul Levin, M.D., M.P.A., *Chief Executive Officer and Medical Director*

## Mailing Address

Psychiatric Services  
American Psychiatric Association  
1000 Wilson Blvd., Suite 1825  
Arlington, VA 22209-3901

## Editorial Office

Phone: 703-907-7885  
E-mail: [psjournal@psych.org](mailto:psjournal@psych.org)

Please visit the journal's Web site at [ps.psychiatryonline.org](http://ps.psychiatryonline.org)
