# There's So Much More to **PSYCHIATRIC SERVICES** Than Meets the Page!

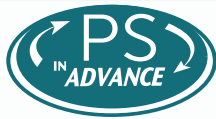

## Psychiatric Services in Advance

Latest research reports!

### High-Cost Patients in Five Diagnostic Groups

Findings of a study focused on the costliest 5% of VA patients suggest opportunities to refine health care delivery models targeting high-cost patients with psychiatric disorders.

### Use of Coercive Procedures in Youth Residential Care

A four-year project to reduce use of restraint and seclusion of youths at New York psychiatric facilities shows promise for dissemination to other residential treatment programs.

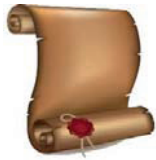

Revisit the field's rich history!

### 50 Years Ago in *Psychiatric Services*

- Craft Classes for Outpatient Occupational Therapy
- Resistance to Psychiatry in a General Hospital
- Dr. Buck Rogers in the 21st Century

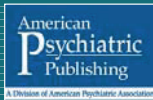

[ps.psychiatryonline.org](http://ps.psychiatryonline.org)

[www.appi.org](http://www.appi.org) • 1-800-368-5777 • Fax: 703-907-1091 • Email: [appi@psych.org](mailto:appi@psych.org)

Priority Code AH1520

Are You Ready to  
**Take the Next Step**  
in Your  
Psychiatric  
Career?

Become a  
**Fellow** of the  
**American  
Psychiatric  
Association**

Earn the  
**FAPA**  
or  
**IFAPA**  
designation

We've made  
it even  
**EASIER**  
to apply!

or  
**International  
Fellow**

For more information and to apply, visit [www.psychiatry.org/BecomeaFellow](http://www.psychiatry.org/BecomeaFellow)
